# Supplementary material
Source: publisher figshare collection journal article supplement (https://karger.figshare.com/ndownloader/files/17212412)
Supplement: Supplementary file 1 [file 17212412]

| **First Author** | **Mode** | **Warning Cue** | **Imperative Stimulus** | **Button** | **"Machine"** | **Stimulus onset asynchrony/Inter-stimulus-interval** | **Trials** | **Mean SRT MCI (msec)** | **Mean SRT HS (msec)** |
| --- | --- | --- | --- | --- | --- | --- | --- | --- | --- |
| ***Levinoff et al.*** | Visual | Ready? | black dot | space bar | computer | 400 msec/no | 50 | 399.9 | 402.6 |
| ***Gorus et al*** | Visual | none | LED button | Push the LED button | one of the eight buttons of the semicircle, always the same illuminates | 3 or 6 sec/ no | 28 | 758.3 | 691.5 |
| ***Facal et al.*** | Visual | none | Press with the finger a circle in the center of the display | circle on the display | Computer, touch display | 0 | not specifed | 467 | 412 |
| ***Bailon et al*** | Visual | Cross | letter | response button with the index finger | laptop computer | no/ 500-700 msec | 100 (anticipaion : inf 120 msec; omission sup 3 sec) | 339 | 313 |
| ***Tales et al.*** | Visual | Cross | line (1,6°) | response-pad button | laptop | no/1200-1400 msec | 404 ((anticipaion : inf 150 msec; omission sup 1500 msec) | 517.7 | 495.6 |
| ***Ballesteros et al.*** | Visual | Fixation point followed by black screen | letter | m key of the computer keyboard | computer screen | no/1,5-2 sec | 120 (omission 5 sec) | 788 | 552 |
| **Fernaeus et al.** | Visual | none | red squares | space bar | Personal Computer run MS dos | 0 | 80 | 272 | 247 |

Supplementary Table: Simple reaction time measurement techniques in the studies included in the meta-analysis.

Abbreviations: SRT: simple reaction time; MCI: mild cognitive impairment; HS: healthy subjects;
